# Supplementary material
Source: PubMed Central journal article supplement (PMC2518626)
Supplement: NIHMS2183-supplement-suppmat.pdf [file NIHMS2183-supplement-suppmat.pdf]

## Enzymatic Synthesis and Biological use of Photolabile Nicotinic acid adenine dinucleotide phosphate (NAADP)

Raman Parkesh\*, Sridhar Vasudhavan, Alex Berry, Anthony Galione, Grant Churchill\*

[raman.parkesh@pharm.ox.ac.uk](mailto:raman.parkesh@pharm.ox.ac.uk); [grant.churchill@pharm.ox.ac.uk](mailto:grant.churchill@pharm.ox.ac.uk)

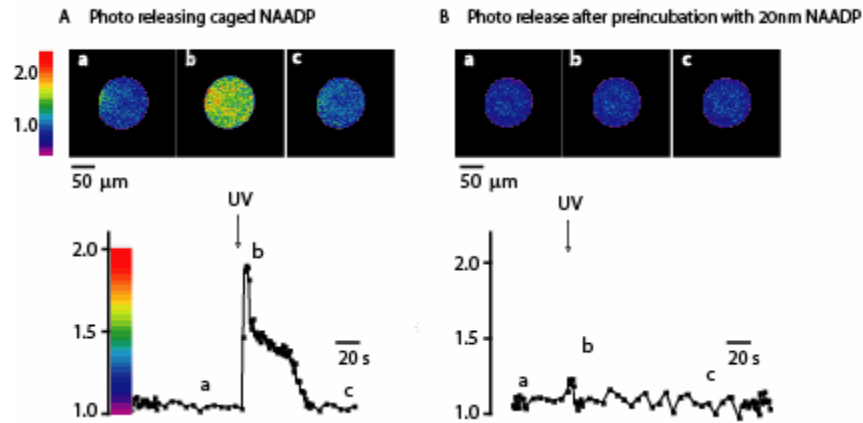

---

Enzymatic route was used to synthesise novel photolabile NAADP. This route will be useful for synthesizing various two-photon caged NAADP. The biological application of this compound was tested in intact sea-urchin eggs.

---
